# Supplementary material for: Transcriptomic Analysis of Rice Plants Overexpressing PsGAPDH in Response to Salinity Stress
Source: MDPI journal article supplement (doi:10.3390/genes12050641), 2021-04-25
Supplement: s1 [file s1]

Table S1: The Location of T-DNA insertions over the rice chromosomes

| No | Line  | Insertion Type   | Chromosome | Gene_ID                           | Description                                                     |
|----|-------|------------------|------------|-----------------------------------|-----------------------------------------------------------------|
| 1  | #2-2  | 5'Upstream-1000  | chr03      | Os03t0244700-02 upstream 0.866kb  | Armadillo-like helical domain containing protein.               |
| 2  | #5-2  | Intergenic       | chr02      | Os02t0682200-01 upstream 10.024kb | Similar to MADS box protein.                                    |
| 3  | #6-1  | Intergenic       | chr07      | Os07t0675166-01 upstream 9.238kb  | Non-protein coding transcript.                                  |
| 4  | #10-1 | Intergenic       | chr08      | Os08t0203150-00 upstream 1.413kb  | Hypothetical gene.                                              |
| 5  | #12-2 | 5'Upstream-1000  | chr06      | Os06t0681950-00 upstream 0.829kb  | Hypothetical conserved gene.                                    |
| 6  | #13-1 | 3'Downstream-300 | chr05      | Os05t0494200-02 downstream 0.22kb | Similar to Cysteine proteinase inhibitor-II (Oryzacystatin-II). |
| 7  | #14-1 | Intergenic       | chr09      | Os09t0348766-01 upstream 15.858kb | Hypothetical gene.                                              |
| 8  | #17-2 | Intergenic       | chr10      | Os10t0130701-01 upstream 1.231kb  | Hypothetical conserved gene.                                    |
| 9  | #19-2 | 3'Downstream-300 | chr02      | Os02t0730300-01 downstream 0.04kb | Similar to Potassium transporter HAK3p (Fragment).              |
| 10 | #21-2 | 5'Upstream-1000  | chr06      | Os06t0681950-00 upstream 0.966kb  | Hypothetical conserved gene.                                    |

Table S2: Raw data information

| Sample Name | Read Length | Total Base    | Read Count | GC | Q20Ratio | Q30Ratio |
|-------------|-------------|---------------|------------|----|----------|----------|
| 1-NW        | 100         | 1,088,687,500 | 10,886,875 | 53 | 0.988    | 0.939    |
| 2-NW        | 100         | 930,753,100   | 9,307,531  | 53 | 0.987    | 0.934    |
| 3-NG1       | 100         | 917,845,000   | 9,178,450  | 53 | 0.987    | 0.932    |
| 5-NG1       | 100         | 1,091,399,300 | 10,913,993 | 53 | 0.987    | 0.934    |
| 4-NG2       | 100         | 1,125,825,700 | 11,258,257 | 53 | 0.989    | 0.939    |
| 8-NG2       | 100         | 1,006,104,400 | 10,061,044 | 54 | 0.986    | 0.931    |
| 6-NG3       | 100         | 939,689,900   | 9,396,899  | 53 | 0.987    | 0.933    |
| 9-NG3       | 100         | 1,021,055,600 | 10,210,556 | 53 | 0.987    | 0.930    |
| 7-SW        | 100         | 924,198,300   | 9,241,983  | 53 | 0.987    | 0.932    |
| 23-SW       | 100         | 1,049,474,300 | 10,494,743 | 53 | 0.988    | 0.941    |
| 12-SG1      | 100         | 1,099,991,100 | 10,999,911 | 53 | 0.989    | 0.943    |
| 27-SG1      | 100         | 938,350,000   | 9,383,500  | 53 | 0.987    | 0.935    |
| 10-SG2      | 100         | 906,256,000   | 9,062,560  | 52 | 0.987    | 0.935    |
| 13-SG2      | 100         | 1,138,778,900 | 11,387,789 | 54 | 0.988    | 0.943    |
| 11-SG3      | 100         | 1,121,420,300 | 11,214,203 | 53 | 0.987    | 0.938    |
| 14-SG3      | 100         | 1,258,748,600 | 12,587,486 | 53 | 0.988    | 0.944    |

Table S3: Alignment rate

| SampleName | OverallAlignmentRate | ConcordantZero | ConcordantPairAlignment | MultipleAlignment |
|------------|----------------------|----------------|-------------------------|-------------------|
| 1-NW       | 98.49%               | 3.10%          | 94.26%                  | 2.65%             |
| 2-NW       | 98.73%               | 2.63%          | 81.93%                  | 15.44%            |
| 3-NG1      | 97.76%               | 4.10%          | 93.21%                  | 2.70%             |
| 5-NG1      | 97.90%               | 3.95%          | 82.05%                  | 14.00%            |
| 4-NG2      | 98.30%               | 3.06%          | 65.60%                  | 31.34%            |
| 8-NG2      | 97.99%               | 3.57%          | 93.57%                  | 2.86%             |
| 6-NG3      | 98.15%               | 3.37%          | 71.27%                  | 25.37%            |
| 9-NG3      | 97.81%               | 4.12%          | 93.13%                  | 2.75%             |
| 7-SW       | 98.69%               | 2.76%          | 83.07%                  | 14.17%            |
| 23-SW      | 98.59%               | 2.97%          | 93.87%                  | 3.16%             |
| 12-SG1     | 97.81%               | 3.92%          | 77.55%                  | 18.53%            |
| 27-SG1     | 97.95%               | 3.82%          | 92.61%                  | 3.57%             |
| 10-SG2     | 97.94%               | 3.87%          | 93.22%                  | 2.91%             |
| 13-SG2     | 97.53%               | 4.30%          | 89.54%                  | 6.16%             |
| 11-SG3     | 97.53%               | 4.52%          | 91.84%                  | 3.64%             |
| 14-SG3     | 98.17%               | 3.27%          | 71.67%                  | 25.07%            |

Table S4: Primers used in qRT-PCR for PsGAPDH and validation of trehalose-6-phosphate synthase genes

| No | Target gene                                                     | Primer sequences (5'→3')                               |
|----|-----------------------------------------------------------------|--------------------------------------------------------|
| 1  | <i>PsGAPDH</i>                                                  | F: AAGCCCGCTGATTACAAAGAGA<br>R: GGCGAGAGTATCCGTATTCGTT |
| 2  | Os11t0513900-01 ( <i>OsTPS8</i> , <i>OsTPS1</i> , <i>TPS1</i> ) | F: CACATGAGCGACGAGCTAAAC<br>R: TCATCCACACGGAAGAAACCT   |
| 3  | Os02t0790500-02 ( <i>OsTPS5</i> )                               | F: GAAAGCGCGTTAGTTTGCA<br>R: TGGCCCCTCTTAACAACGAC      |
| 4  | Os08t0409100-01 ( <i>OsTPS6</i> )                               | F: ACCCCAACTGAAGCTCACG<br>R: GAACCCTAGCGACTCGAGGA      |
| 5  | Os09t0332100-01( <i>OsTPP3</i> )                                | F: GGTTGTTTGGCGGGACCTAC<br>R: GGGGTTGTTGTGCTGGTAGTA    |
| 6  | Os03t0386500-01 ( <i>OsTPP9</i> )                               | F: CATGACGGACGAGATGAGGG<br>R: CTTGGATGTCCATCCCGTGG     |
| 7  | Os02t0753000-01 ( <i>OsTPP4</i> , <i>OsTPP7</i> )               | F: CAAGGTTTCGCAACTTCGTCG<br>R: CGATCATGGGGAGGAAGCTCG   |
| 8  | <i>OsActin1</i>                                                 | F: ACAGGTATTGTGTTGGACTCTGG<br>R: AGTAACCACGCTCCGTCAGG  |
